# Supplementary material for: Metabolic and microstructural alterations in the SLE brain correlate with cognitive impairment
Source: JCI journal article supplement (doi:10.1172/jci.insight.124002), 2019-01-10
Supplement: sd1 [file 1]

## Supplemental Data

### Resting Glucose Metabolism Validation Studies

#### 1. Validation of hypermetabolic regions previously identified in Group 1

The hippocampus, orbitofrontal cortex (Brodmann area (BA) 11), and putamen/globus pallidus (GP) were previously identified as regions with abnormal resting hypermetabolism in SLE-1 compared to 17 healthy control (HC-1) subjects (1). Glucose metabolism in these regions prospectively measured in the 20 SLE-2 subjects also demonstrated significant hypermetabolism in the hippocampus ( $p < 0.008$ ), orbitofrontal cortex ( $p < 0.006$ ) and putamen/GP ( $p < 0.004$ ) compared to the 17 HC-1 subjects plus an additional 8 healthy control subjects (HC-2) (combined; 25 HC-1/2). Metabolism in these regions was not different between the SLE-2 and SLE-1 subjects ( $p > 0.22$ ). These results demonstrate prospective validation in the SLE-2 subjects of the hypermetabolic regions previously identified in SLE-1 subjects.

#### 2. Hypermetabolic regions identified in Group 2

A whole brain, voxel-wise approach was used to compare FDG-PET scans in the 20 SLE-2 subjects to the group of 25 HC-1/2. Significant hypermetabolism (**Supplemental Table 1**) was identified in the hippocampus ( $p < 0.001$ ), orbitofrontal cortex (BA11) ( $p < 0.001$ ), and putamen/GP extending into the thalamus ( $p < 0.001$ ); the same hypermetabolic regions previously identified in SLE-1 subjects (1). Four new hypermetabolic regions were also identified, including the sensorimotor cortex (SMC, BA 3/4) ( $p < 0.001$ ), occipital lobe (BA 19) ( $p < 0.001$ ), temporal lobe (BA 37) ( $p < 0.001$ ), and parietal lobe (BA 7/40) ( $p < 0.001$ ) (**Supplemental Table 1**).

Glucose metabolism in these regions was then retrospectively measured in the 17 SLE-1 compared to the HC-1/2 subjects; SLE-1 subjects again demonstrated significant hypermetabolism in the hippocampus ( $p = 0.001$ ), orbitofrontal cortex ( $p < 0.03$ ), putamen/GP ( $p < 0.001$ ), and SMC ( $p < 0.03$ ), but not in the occipital lobe ( $p = 0.077$ ), temporal lobe ( $p = 0.061$ ), and parietal lobe ( $p = 0.61$ ). Metabolism was not different between the SLE-2 and SLE-1 subjects in any of these hypermetabolic regions ( $p > 0.08$ ), except the parietal lobe where SLE-2 had higher metabolism than SLE-1 ( $p < 0.02$ ) (**Table 2**). Thus, retrospective

validation of the hypermetabolic regions identified in SLE-2 using an unbiased, voxel wise approach, again demonstrated similar regional hypermetabolism in the 3 regions identified originally in SLE-1 (hippocampus, orbitofrontal cortex, putamen/GP) plus the SMC. These results suggest that hypermetabolism in these regions represents a biologic marker of disease and is not spurious.

To understand why the 4 new regions identified in the SLE-2 group had not been identified in the original analyses with the SLE-1 group, we retrospectively computed and compared metabolism in the 17 SLE-1 patients and the 17 HC-1 in these 4 new regions. We found that 3 of the 4 regions showed a post-hoc trend ( $p=0.09$ ; Temporal Lobe) or non-significant ( $p>0.20$ ; Occipital Lobe and Parietal Lobe) differences between groups; while there was one new region (Sensorimotor Cortex) that showed significantly higher metabolism ( $p=0.005$ ) in the SLE-1 group, it still did not meet the basic voxel-level threshold of  $p<0.001$  used in the SPM analysis. By contrast, metabolism in the four new regions was significantly higher in the SLE-2 patients compared to the HC-1/2 control group, exceeding the prespecified SPM threshold. These results demonstrate that the new regions were in fact identified through the addition of the SLE-2 group to the patient mix. That said, the SLE-1 and SLE-2 patients differed in their respective distributions of disease duration (Table 1, Results Section 1.0). We note that SLE-2 included patients with disease duration between 2 and 10 years, whereas SLE-1 patients were selected as having either short ( $\leq 2$  years) or long ( $\geq 10$  years) disease duration. The data suggest that the inclusion of patients of intermediate disease duration in SLE-2 facilitated the detection of several new SLE-related areas which had failed to exceed threshold in the dichotomized SLE-1 sample.

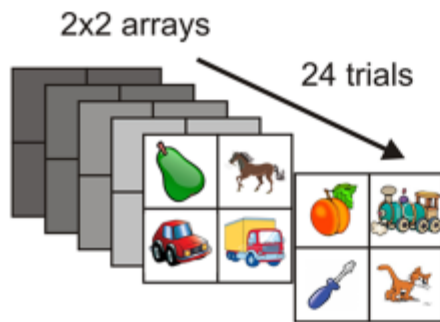

**Supplemental Figure 1.** 2x2 non-spatial and spatial memory task. Subjects observed drawings of objects arranged as  $2 \times 2$  arrays. Immediately after viewing they were asked 1) whether a particular object was present in the array; a question that assesses object memory, or 2) to identify the relationship of one particular object to another in the array; an assessment of spatial memory.

**Supplemental Table 1.** Brain regions with significant differences in metabolic activity between SLE subjects from Groups 1 (SLE-1) and 2 (SLE-2), and 25 Healthy Controls (HC-1/2).

| Brain region                        | Coordinates <sup>a</sup> |     |     |                               | HC<br>(n=25)             | SLE<br>Group 2<br>(n=20) | SLE<br>Group 1<br>(n=17) |
|-------------------------------------|--------------------------|-----|-----|-------------------------------|--------------------------|--------------------------|--------------------------|
|                                     | x                        | y   | z   | Z <sub>max</sub> <sup>b</sup> |                          |                          |                          |
| Hippocampus, left                   | -28                      | -24 | 0   | 3.96 <sup>c</sup>             | 1.35 (0.07) <sup>d</sup> | 1.44 (0.07)***           | 1.42 (0.06)**            |
| Orbitofrontal Cortex (BA 11), right | 30                       | 42  | -12 | 3.48                          | 1.48 (0.07)              | 1.57 (0.09)***           | 1.53 (0.09)**            |
| left                                | -14                      | 48  | -18 | 3.75                          | 1.47 (0.05)              | 1.54 (0.09)***           | 1.51 (0.06)**            |
| Putamen/GP/thalamus, right          | 28                       | -14 | 4   | 4.21 <sup>c</sup>             | 1.45 (0.07)              | 1.55 (0.06)***           | 1.54 (0.08)***           |
| Sensorimotor Cortex (BA 3/4), right | 4                        | -38 | 74  | 3.74 <sup>c</sup>             | 1.47 (0.12)              | 1.61 (0.12)***           | 1.58 (0.13)**            |
| left                                | -4                       | -38 | 72  | 3.65 <sup>c</sup>             | 1.53 (0.10)              | 1.66 (0.12)***           | 1.62 (0.13)*             |
| Occipital Lobe (BA 19), left        | -32                      | -72 | 6   | 3.92                          | 1.19 (0.07)              | 1.31 (0.12)***           | 1.24 (0.11)              |
| Temporal Lobe (BA 37), right        | 32                       | -44 | -22 | 3.73                          | 1.59 (0.08)              | 1.68 (0.08)***           | 1.63 (0.09)              |
| Parietal Cortex (BA 7/40), right    | 50                       | -58 | 50  | 3.68                          | 1.68 (0.08)              | 1.80 (0.11)***           | 1.70 (0.11)              |
| left                                | -48                      | -52 | 48  | 3.73                          | 1.79 (0.07)              | 1.87 (0.08)***           | 1.79 (0.10)              |

<sup>a</sup> Montreal Neurological Institute (MNI) standard space (60)

<sup>b</sup> Significant at p<0.001 (peak voxel, uncorrected). <sup>c</sup> Significant at p<0.05, corrected for cluster extent.

<sup>d</sup> Mean (SD) regional metabolism

\* p<0.05, \*\* p<0.01, \*\*\* p<0.001, Student's T-test of SLE subjects vs. Healthy Control (HC) group BA, Brodmann area; GP, globus pallidus; HC, healthy controls; SLE, systemic lupus erythematosus
